# Supplementary material for: On the origin of open-circuit voltage losses in flexible n-i-p perovskite solar cells
Source: PubMed Central journal article supplement (PMC6691881; doi:10.1080/14686996.2019.1633952), 2019-06-21
Supplement: TSTA_A_1633952_SM0895.pdf [file TSTA_A_1633952_SM0895.pdf]

# Supplementary Information

## On the Origin of Open-Circuit Voltage Losses in Flexible *n-i-p* Perovskite

### Solar Cells

Stefano Pisoni<sup>a\*</sup>, Martin Stolterfoht<sup>b</sup>, Johannes Loekinger<sup>a</sup>, Thierry Moser<sup>a</sup>, Yan Jiang<sup>a</sup>, Pietro Caprioglio<sup>b,c</sup>, Dieter Neher<sup>b</sup>, Stephan Buecheler<sup>a</sup> and Ayodhya N. Tiwari<sup>a</sup>

<sup>a</sup>*Laboratory for Thin Films and Photovoltaics, Empa-Swiss Federal Laboratories for Materials Science and Technology, Ueberlandstrasse 129, 8600 Duebendorf, Switzerland;*

<sup>b</sup>*Institute of Physics and Astronomy, University of Potsdam, Karl-Liebknecht-Strasse 24-25, D-14476 Potsdam-Golm, Germany;*

<sup>c</sup>*Young Investigator Group Perovskite Tandem Solar Cells, Helmholtz-Zentrum Berlin fuer Materialien und Energie GmbH, Kekuléstrasse 5, 12489 Berlin, Germany.*

**\*E-mail: stefano.pisoni@empa.ch**

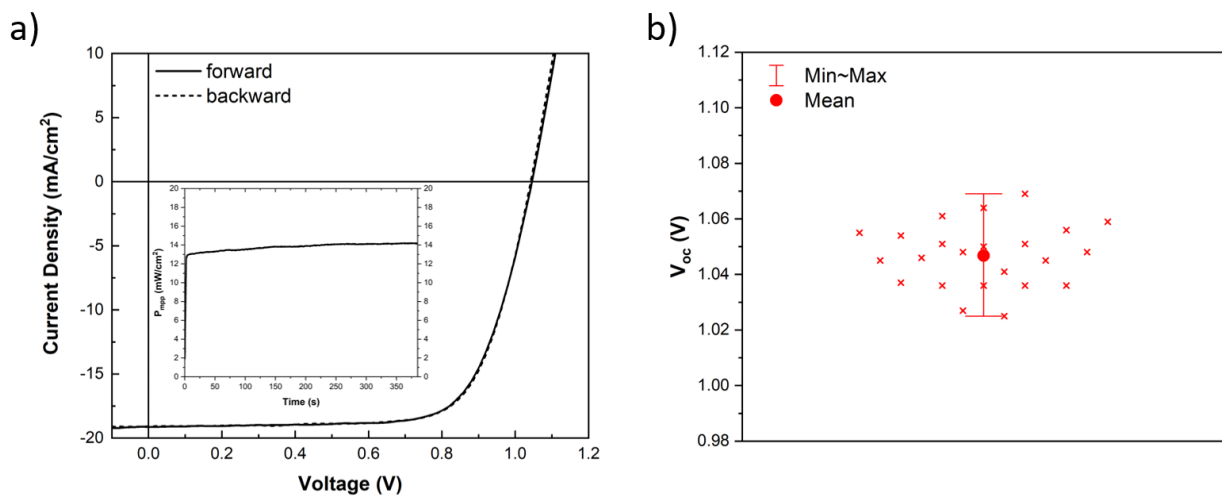

**Figure S1.** a)  $J$ - $V$  characteristics of the flexible PSC under forward ( $-0.1$  to  $1.4 \text{ V}$ ) and backward ( $1.4$  to  $-0.1 \text{ V}$ ) measurements. The inset shows the power output at MPP under 1 sun continuous illumination. b) Statistics of  $V_{\text{oc}}$  values for the flexible PSCs.

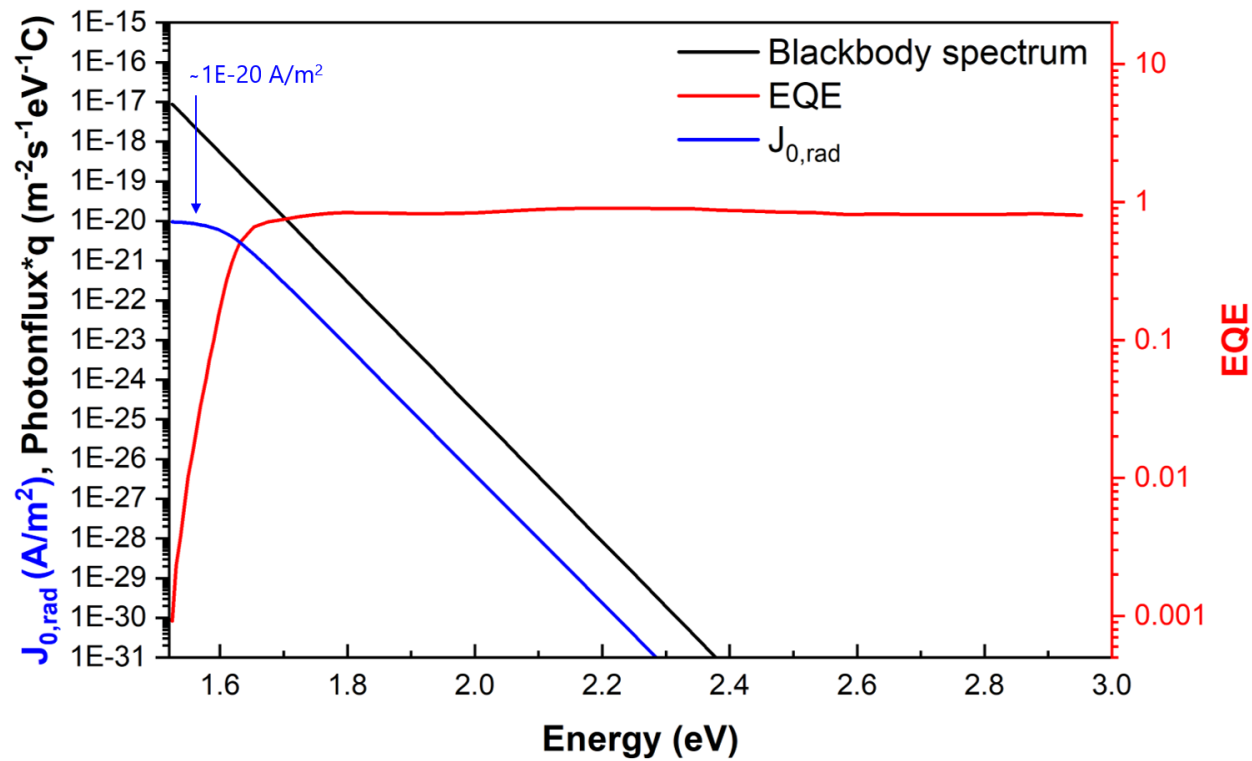

**Figure S2.** EQE spectrum (red curve) of our low-temperature deposited flexible PSC structure, blackbody spectrum at 300 K (black curve) and  $J_{0,rad}$  calculated from the integration of blackbody spectrum\*EQE.  $J_{0,rad}$  is  $\sim 1 \times 10^{-20}$  A/m<sup>2</sup>.

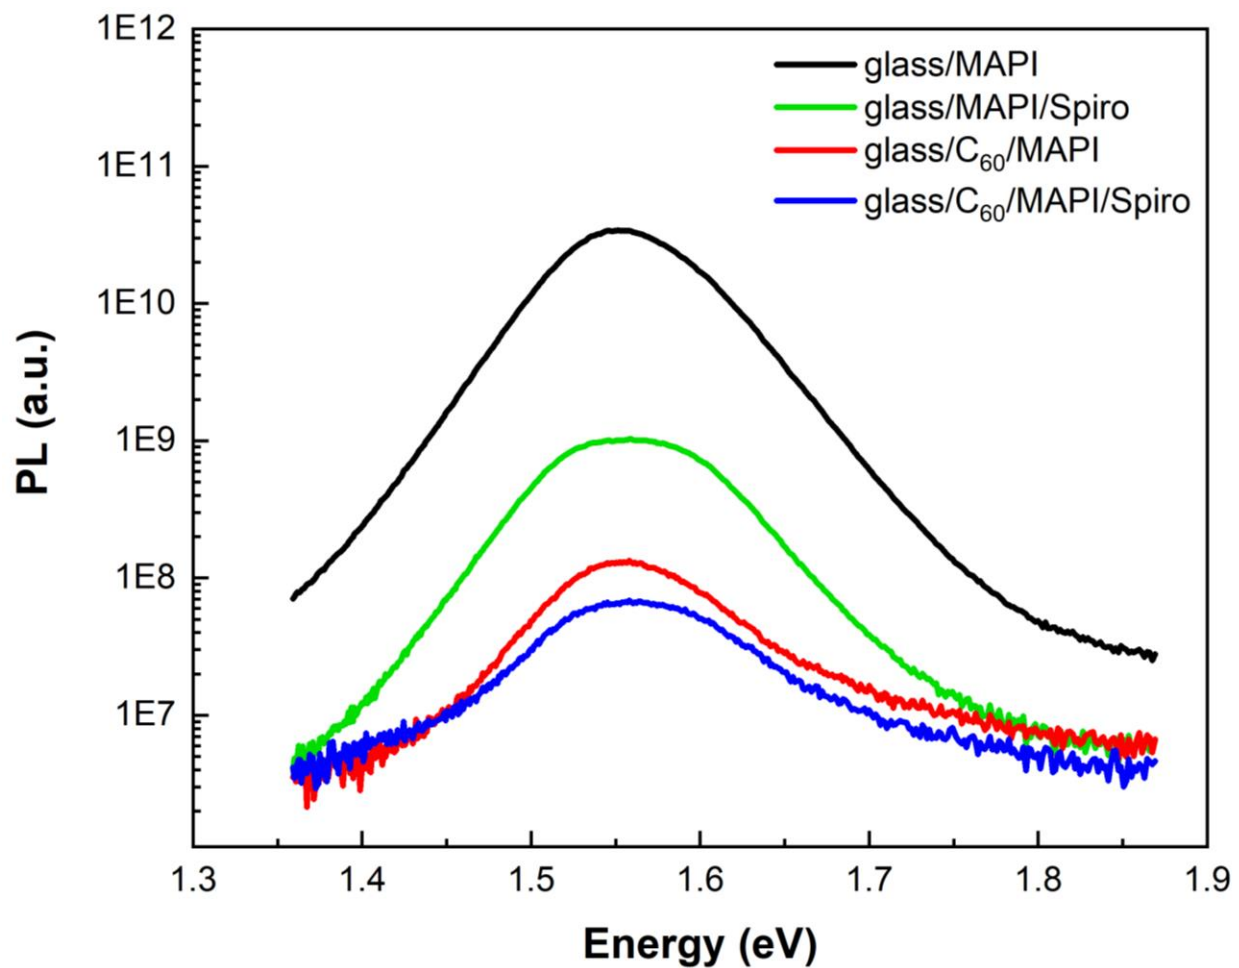

**Figure S3.** Comparison of PL spectra of the different heterojunctions investigated: glass/MAPI, glass/MAPI/Spiro, glass/C<sub>60</sub>/MAPI and glass/C<sub>60</sub>/MAPI/Spiro.

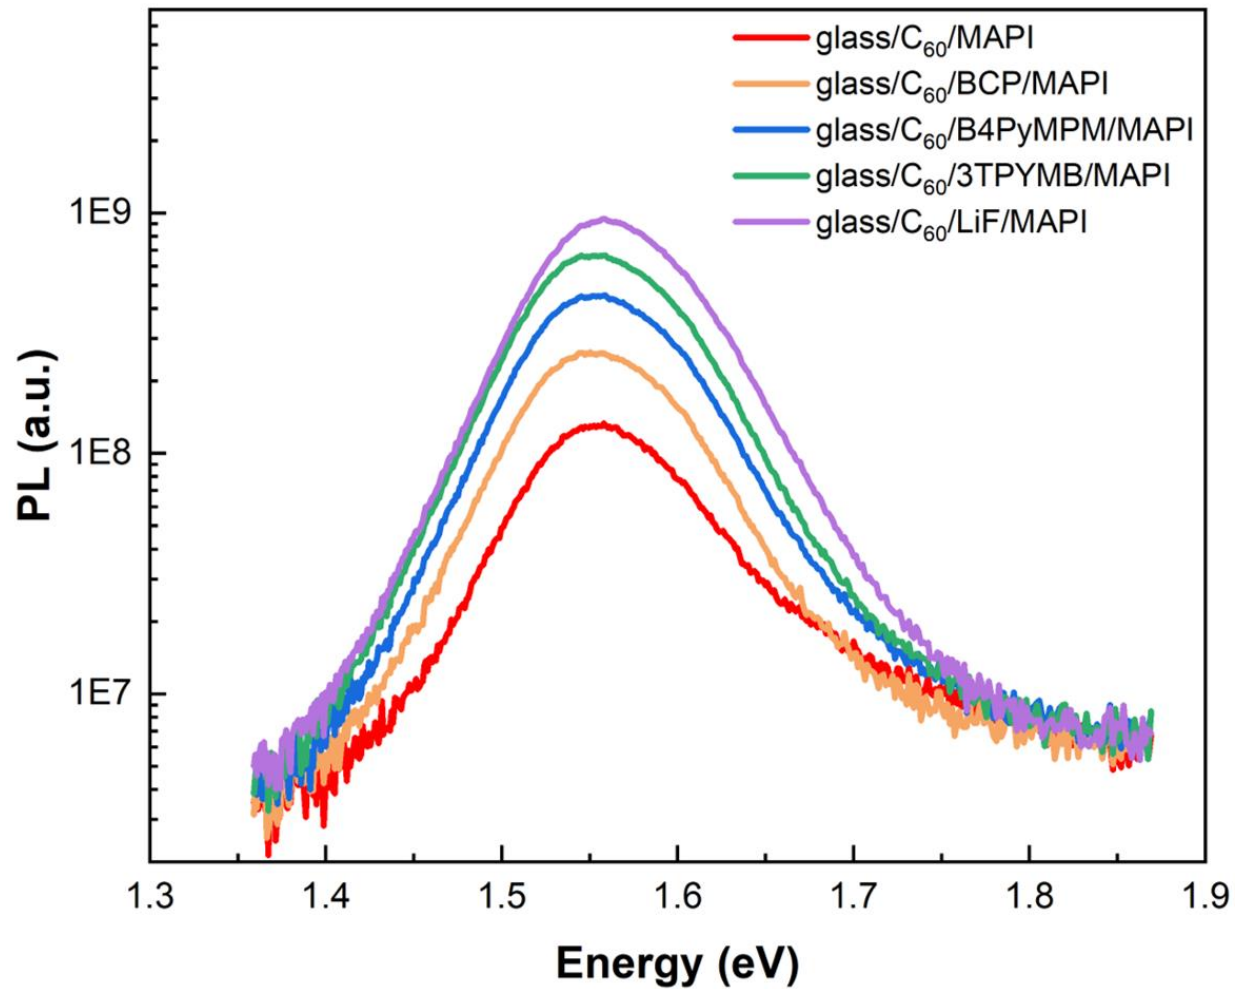

**Figure S4.** Comparison of PL spectra for the different interfacial modifications studied with respect to glass/C<sub>60</sub>/MAPI: glass/C<sub>60</sub>/MAPI, glass/C<sub>60</sub>/BCP/MAPI, glass/C<sub>60</sub>/B4PyMPM/MAPI, glass/C<sub>60</sub>/3TPYMB/MAPI and glass/C<sub>60</sub>/LiF/MAPI/Spiro.

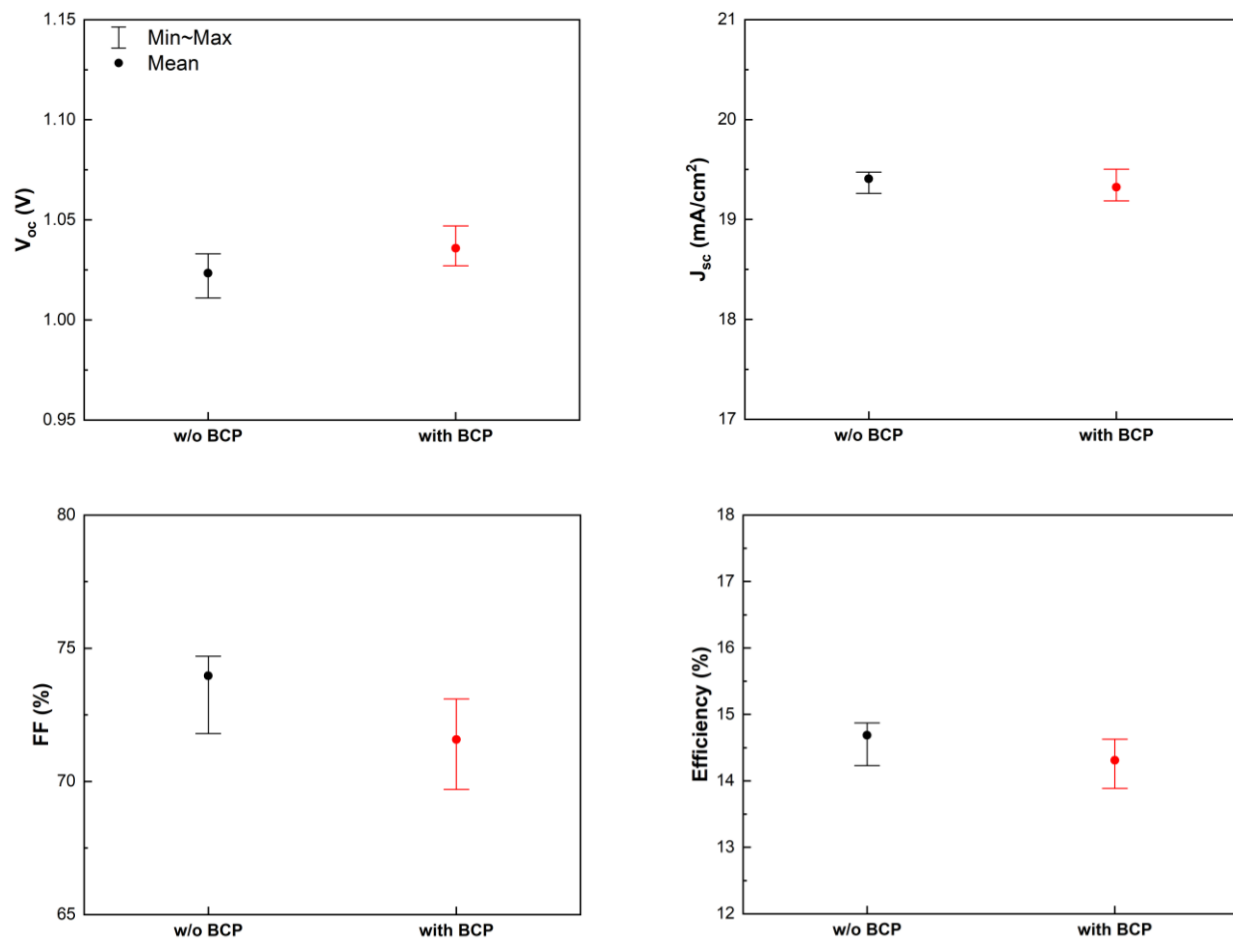

**Figure S5.** Comparison among PV parameters statistics of the flexible PSCs with and without BCP interfacial modification.

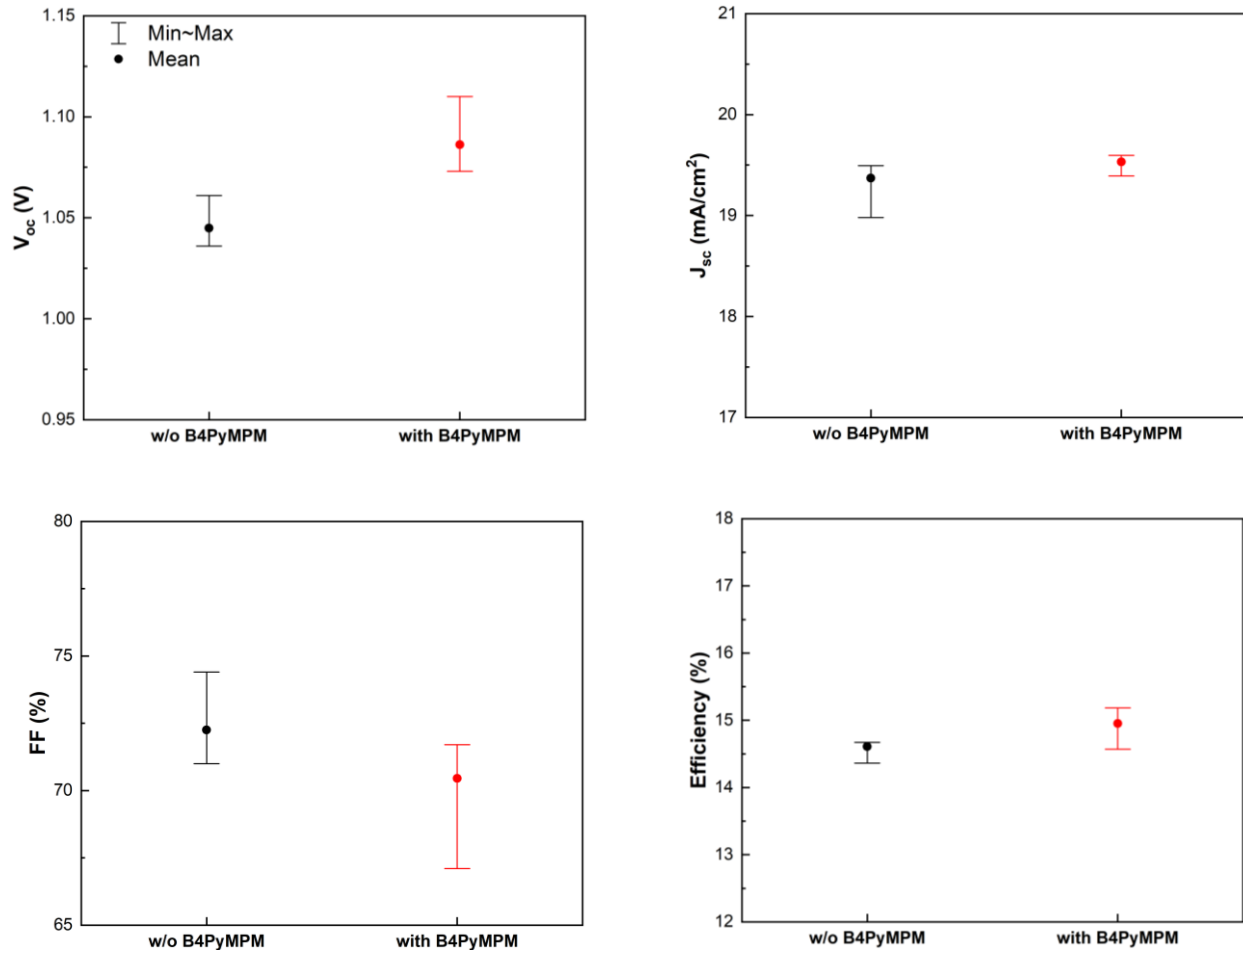

**Figure S6.** Comparison among PV parameters statistics of the flexible PSCs with and without B4PyMPM interlayer application.

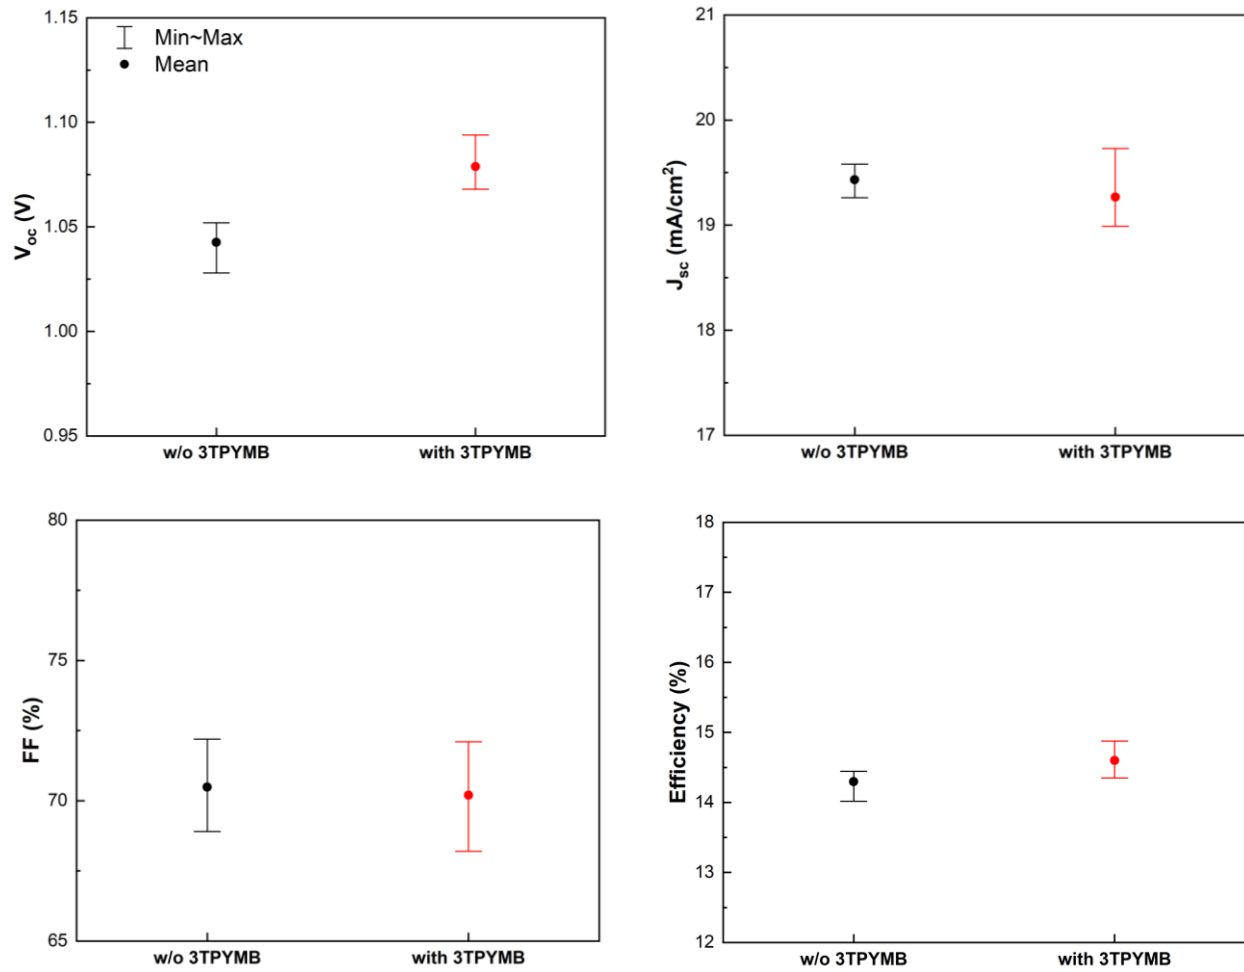

**Figure S7.** Comparison among PV parameters statistics of the flexible PSCs with and without 3TPYMB interfacial modification.



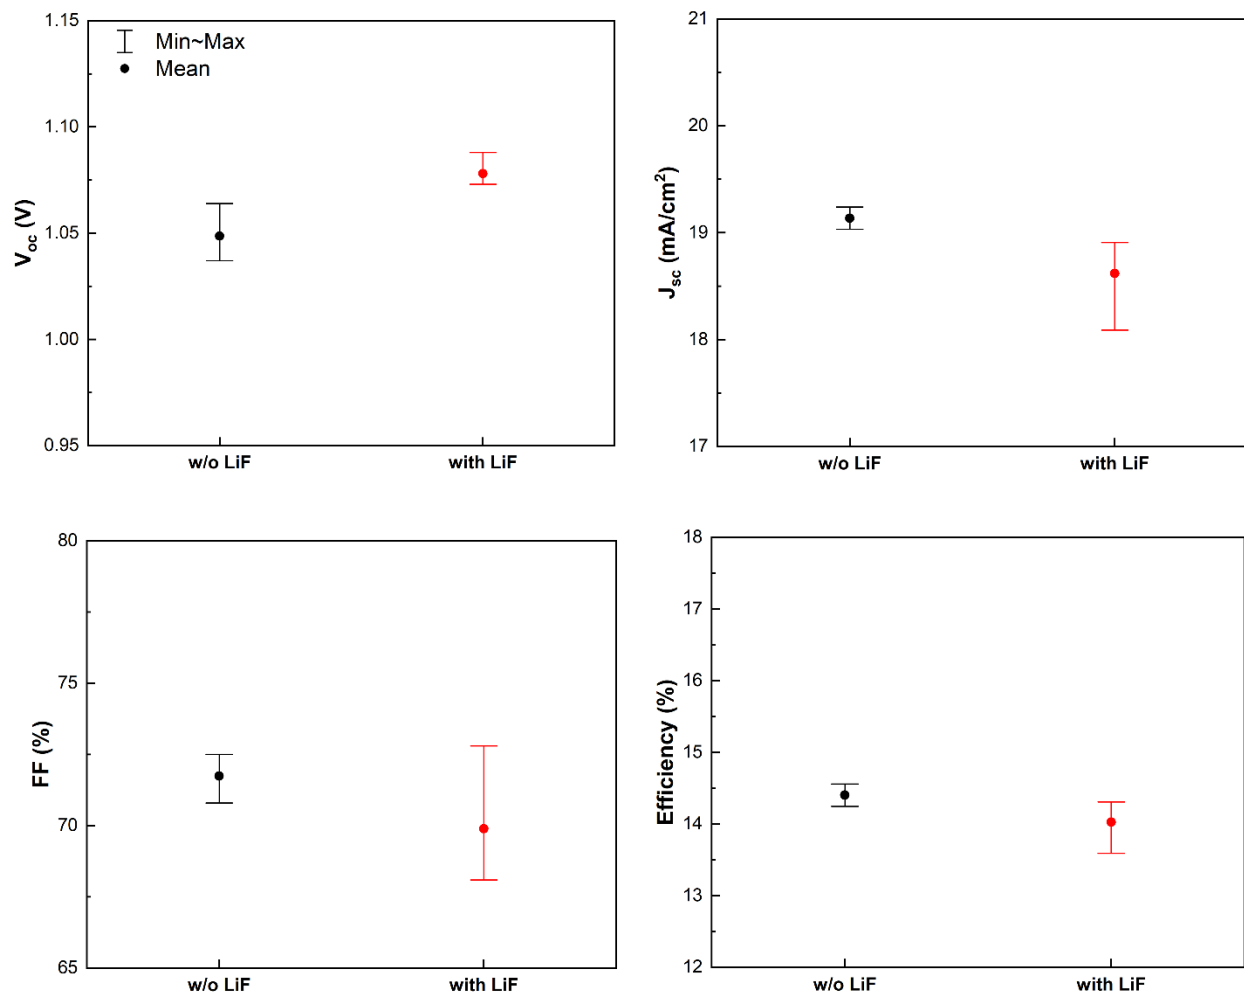

**Figure S8.** Comparison among PV parameters statistics of the flexible PSCs with and without LiF interlayer.

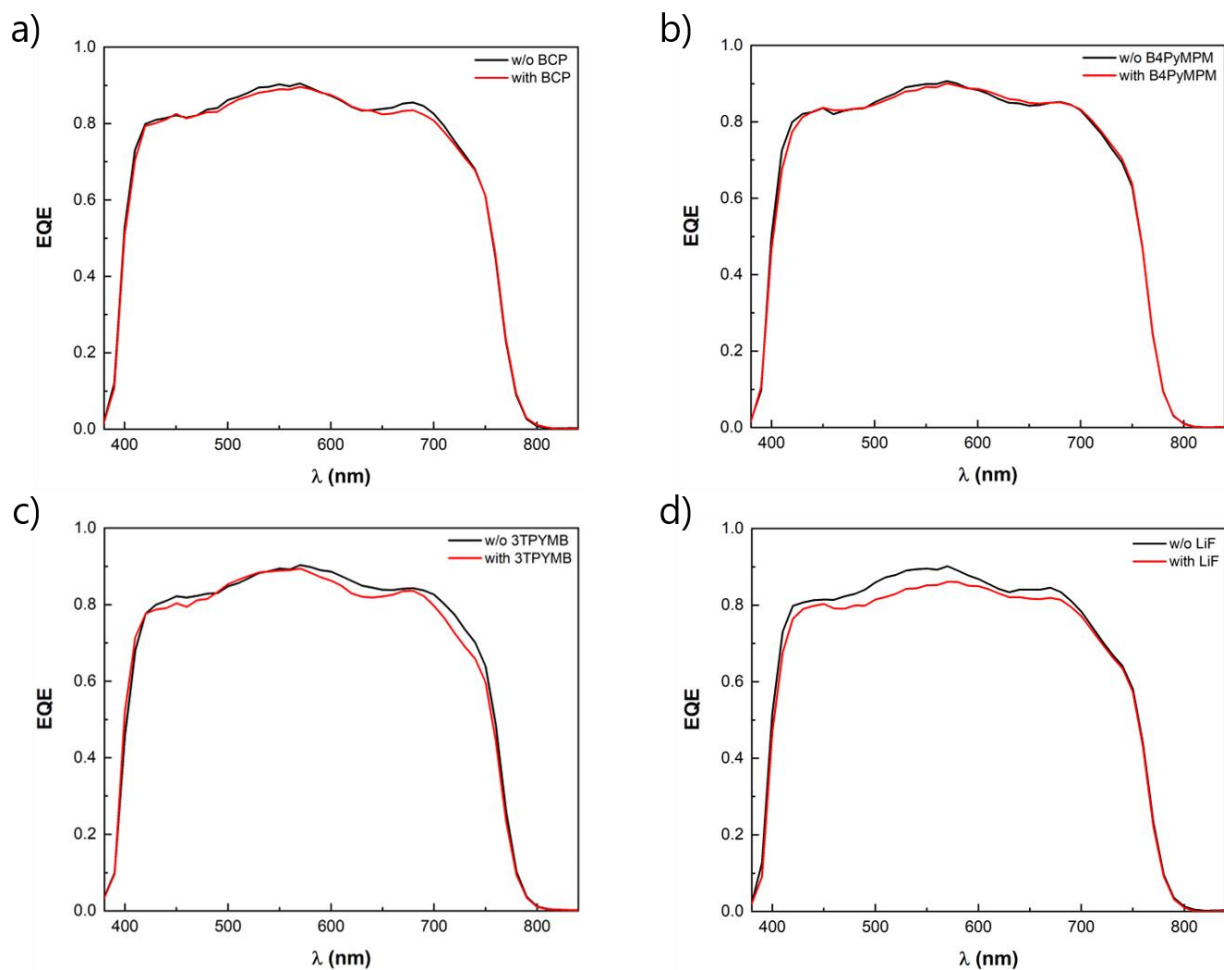

**Figure S9.** Comparison of EQE spectra for the different interfacial modifications investigated (devices shown in Figure 3). a) without BCP (extracted  $J_{sc}$ =19.5 mA/cm<sup>2</sup>) and with BCP ( $J_{sc}$ =19.3 mA/cm<sup>2</sup>), b) without B4PyMPM ( $J_{sc}$ =19.5 mA/cm<sup>2</sup>) and with B4PyMPM ( $J_{sc}$ =19.5 mA/cm<sup>2</sup>), c) without 3TPYMB ( $J_{sc}$ =19.5 mA/cm<sup>2</sup>) and with 3TPYMB ( $J_{sc}$ =19.2 mA/cm<sup>2</sup>), d) without LiF ( $J_{sc}$ =19.3 mA/cm<sup>2</sup>) and with LiF ( $J_{sc}$ =18.7 mA/cm<sup>2</sup>).

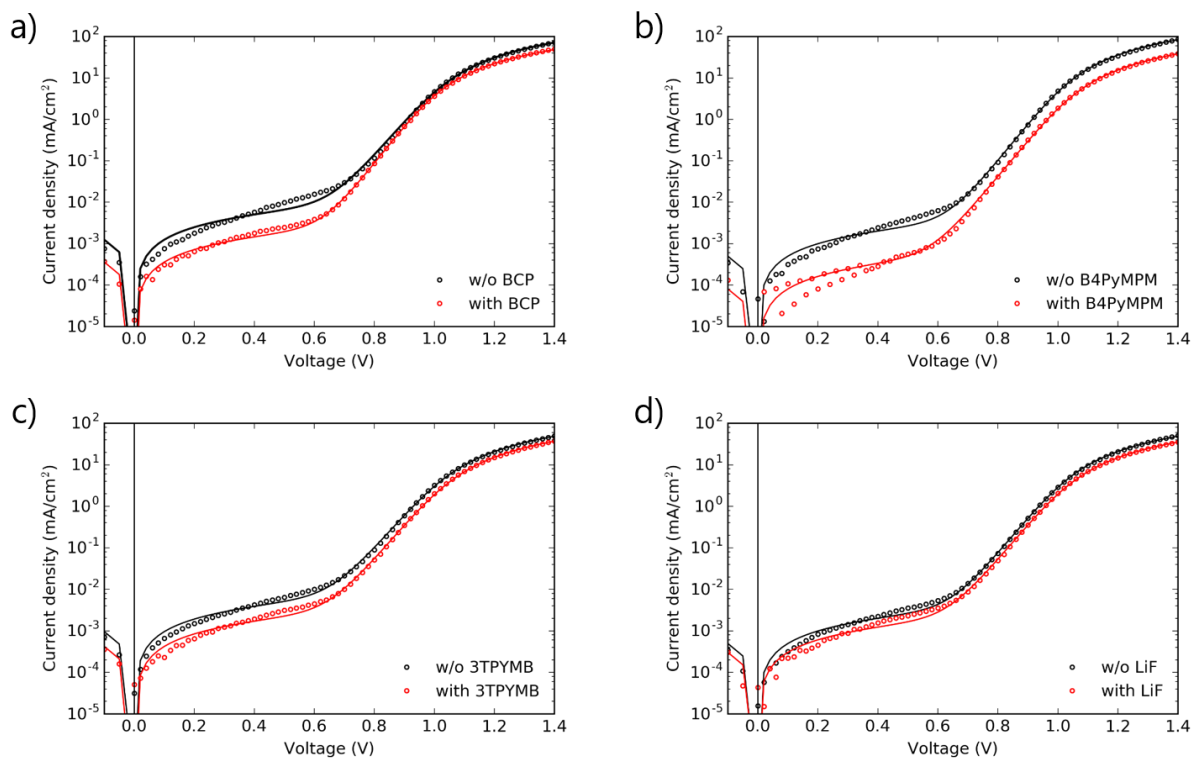

**Figure S10.** Comparison of semi-log plots of dark  $J$ - $V$  curves of devices from Figure 3. a) with and without BCP, b) with and without B4PyMPPM, c) with and without 3TPYMB, d) with and without LiF interfacial modifications.

**Table S1.**  $R_s$  values obtained from fitting dark  $J$ - $V$  curves to a single diode with two resistors model.

|                                  | w/o<br>BCP | with<br>BCP | w/o<br>B4PyMPM | with<br>B4PyMPM | w/o<br>3TPYMB | with<br>3TPYMB | w/o<br>LiF | with<br>LiF |
|----------------------------------|------------|-------------|----------------|-----------------|---------------|----------------|------------|-------------|
| $R_s$<br>( $\Omega\text{cm}^2$ ) | 3.8        | 6.2         | 3.3            | 6.8             | 5.5           | 7.0            | 5.6        | 7.6         |

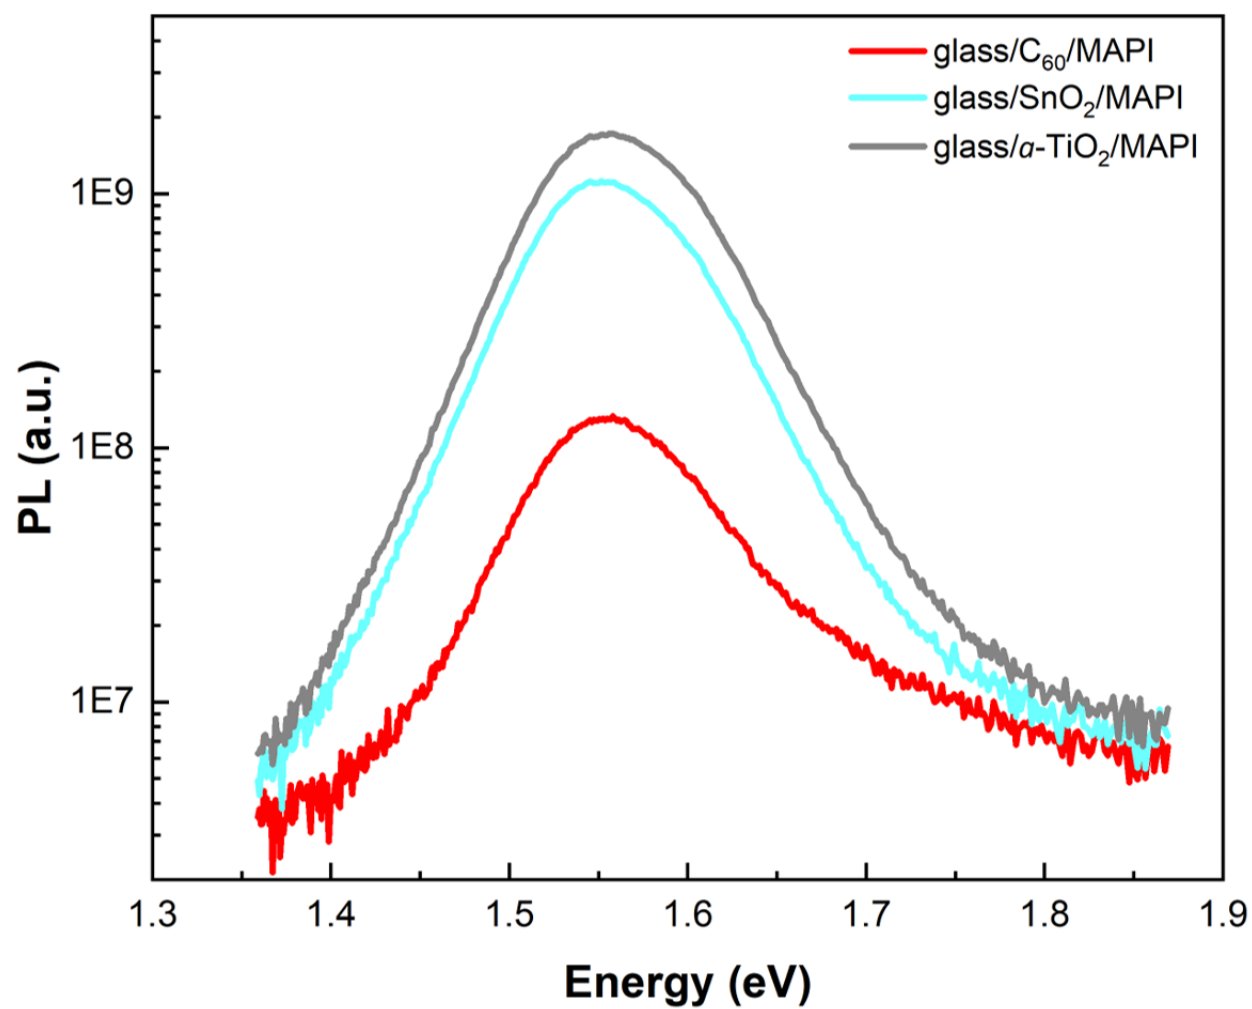

**Figure S11.** Comparison of PL spectra for different ETLs: glass/C<sub>60</sub>/MAPI, glass/SnO<sub>2</sub>/MAPI and glass/a-TiO<sub>2</sub>/MAPI.

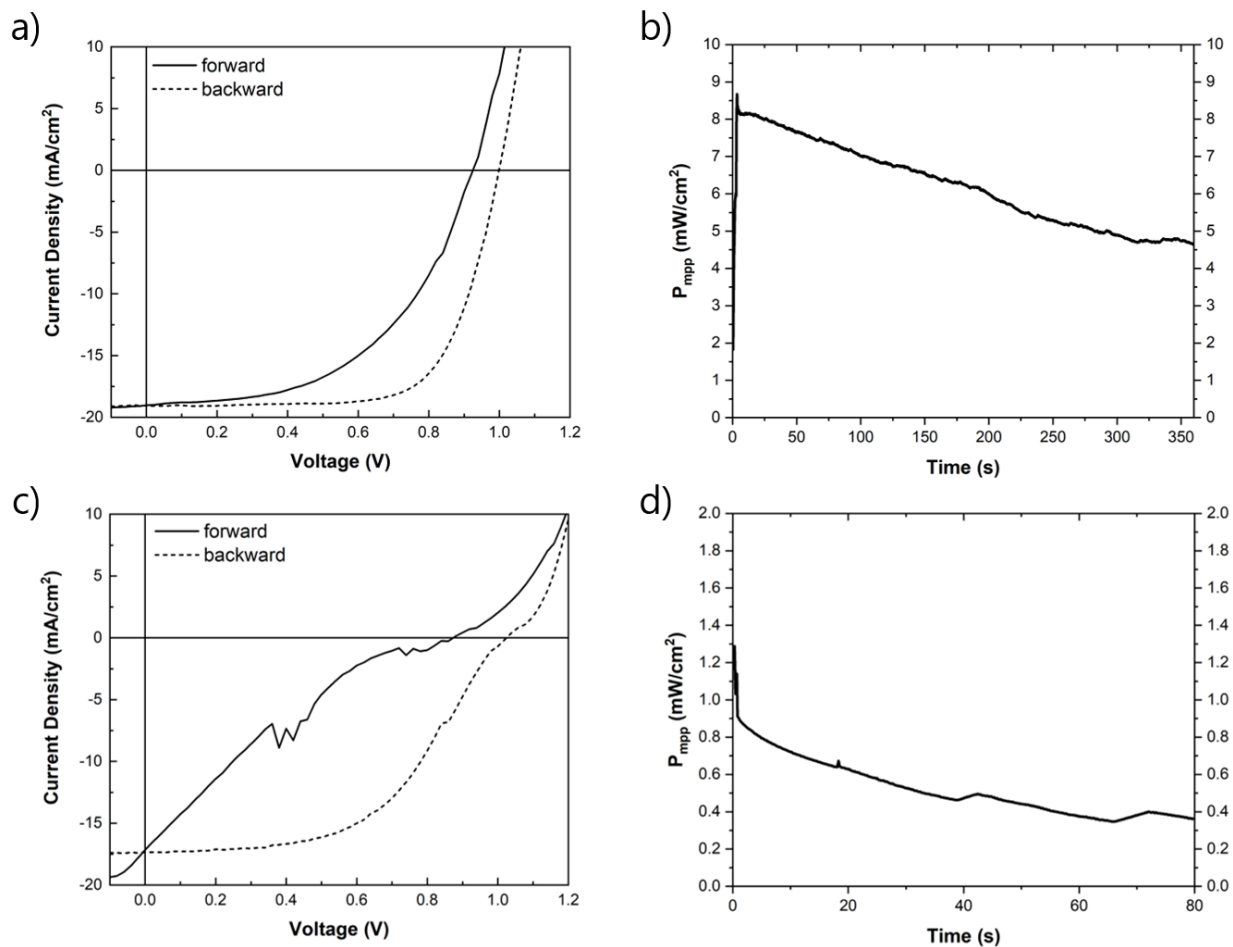

**Figure S12.** a)  $J-V$  characteristics for PSCs with spin coated  $\text{SnO}_2$  as ETL (both forward and backward measurements), b) MPP tracking under 1 sun continuous illumination. c)  $J-V$  characteristics for PSCs with ALD deposited  $\alpha\text{-TiO}_2$  as ETL (both forward and backward measurements), d) MPP tracking under 1 sun continuous illumination.

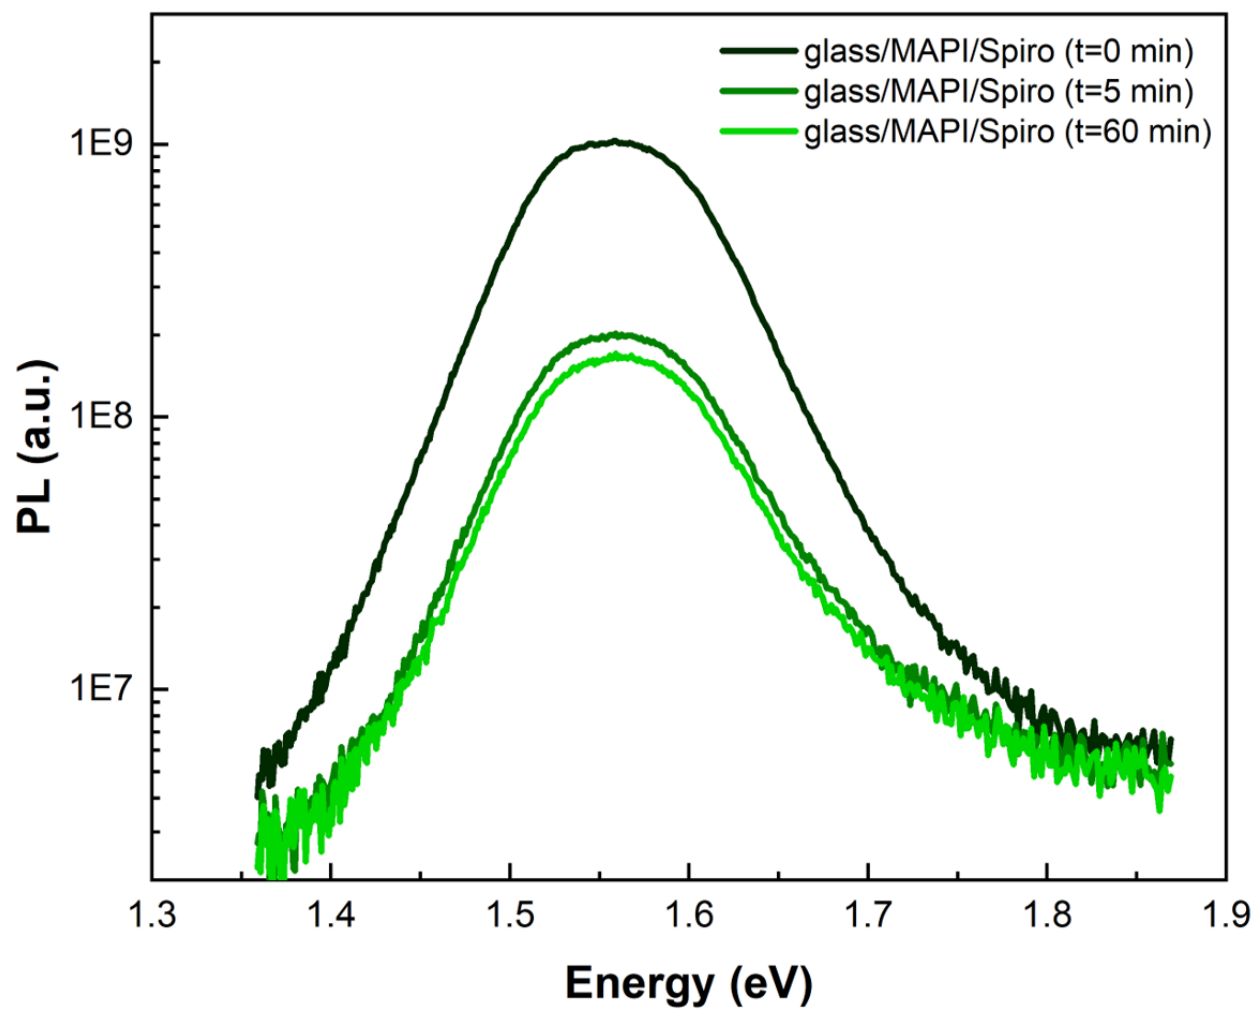

**Figure S13.** Comparison of PL spectra for glass/MAPI/Spiro at different exposure time to ambient atmosphere: t=0, 5 and 60 minutes.
